# Supplementary material for: Perspectives on the Use of Outpatient Parenteral Antibiotic Therapy for People who Inject Drugs: Results From an Online Survey of Infectious Diseases Clinicians
Source: PubMed Central journal article supplement — Open Forum Infect Dis. 2023 Jul 15;10(7):ofad372. doi: 10.1093/ofid/ofad372 (PMC10372854; doi:10.1093/ofid/ofad372), 2023-07-15
Supplement: ofad372_supplementary_data.pdf [file ofad372_supplementary_data.pdf]

# OPAT for PWID survey

Dear Colleagues,

We are seeking to better understand infectious diseases (ID) provider practices as they relate to inclusion of persons who inject drugs (PWID) in outpatient parenteral antimicrobial therapy (OPAT) in the United States. Please complete the short (5 mins) survey below.

Study Goals:

- 1) Determine ID provider preference to include PWID in OPAT
- 2) Determine perceived/actual barriers to inclusion
- 3) Determine perceived factors for success (defined as completion of OPAT course)

Thank you!

Daniel Solomon, MD  
 Ellen Eaton, MD  
 Alice Thornton, MD  
 Monica Sikka, MD  
 Alison Beielor, PA-C  
 Shireesha Dhanireddy, MD

---

Infectious Disease Provider Type

- MD  
 DO  
 NP  
 PA  
 Pharmacist

---

Number of years of experience in Infectious Disease practice in the United States (if n/a, the survey will end here)

- 0 to 5 years  
 6 to 10 years  
 11 to 15 years  
 16 to 20 years  
 greater than 21 years  
 not applicable

---

Infectious Disease Practice Type (select all that apply)

- University/Medical School (Academic Medical Center)  
 Private Practice  
 Hospital/Clinic  
 Federal Government  
 Prefer not to answer  
 Other

---

Infectious Disease Practice Setting

- Urban  
 Suburban  
 Rural

---

Infectious Disease Practice Zip Code

\_\_\_\_\_

---

Do you provide Outpatient Parenteral Antimicrobial Therapy (OPAT) services at your institution?

- No  
 Yes

Where do your patients on OPAT receive parenteral antibiotics? (select all that apply)

- Home
- Medical respite program
- Short term physical rehabilitation facility
- Skilled nursing facility
- Infusion center
- Jail or Prison
- Other facility

Are current or recent (in past 6 months) people who inject drugs (PWID) eligible to receive OPAT?

- No
- Yes

If PWID do qualify for OPAT; do you have a formal institutional framework/algorithm for determining who may be eligible?

- No formal algorithm or framework for eligibility (determined on a case by case basis)
- Yes formal algorithm or framework for eligibility (please describe below)

Description of institutional formal algorithm or framework for PWID eligibility for OPAT (if applicable).

\_\_\_\_\_

What are the barriers to including PWID in OPAT? (select all that apply)

- Risk of patients tampering with PICC line
- PICC may be a trigger for relapse to drug use
- Housing insecurity
- Inadequate access to inpatient addiction treatment during hospitalization
- Inadequate access to outpatient addiction treatment after hospitalization
- Medical-legal risk is too high
- Colleagues not all aligned - no consensus in my ID practice whether OPAT is appropriate for PWID
- Primary hospital teams (medicine, surgery) would not be supportive with OPAT for this population
- Patient would not be accepted by visiting/home health nurses services or pharmacy/infusion company
- Payor/insurance issues
- Other reason (see below for free text option)
- No barriers

Other barriers (free text)

\_\_\_\_\_

If PWID do not receive OPAT; in what alternate settings do PWID receive parenteral antibiotics?

- Remain inpatient at hospital
- Skilled nursing facility
- Short term physical rehabilitation facility
- Other location
- Not applicable

Does your hospital have inpatient addiction consultation services?

- No
- Yes
- Not sure

Is peer support available for inpatients with PWID?

- No
- Yes
- Not sure

Is social work/case management available inpatient for PWID?

- No
- Yes
- Not sure

---

Do patients have access to outpatient addiction treatment after discharge?

- No access to treatment
- Yes, but limited access to treatment
- Yes, good access to treatment
- Yes, excellent access to treatment
- Not sure about access to treatment

---

Is OPAT care linked with addiction treatment after discharge, including medication for opioid use disorder (MOUD)?

- No linkage
- On site linkage
- Off site linkage

---

Is peer support available for outpatient PWID on OPAT?

- No
- Yes
- Not sure

---

Is social work/case management available for outpatient PWID on OPAT?

- No
- Yes
- Not sure

---

Does your group have a dedicated ID provider who is also a specialist in addiction?

- No
- Yes
- Not sure

---

Approximately how many PWID are treated with OPAT per month at your institution?

- Not applicable, PWID are not placed on OPAT
- 0-5
- 5-10
- 10-20
- >20

---

Of that group, approximately what percent successfully completes their OPAT course?

- Unsure
- 10%
- 25%
- 50%
- 75%
- 100%

---

What do you perceive as the biggest barriers to successful completion of OPAT for PWID? (select all that apply)

- Concern for nonadherence to medication regimen
- Loss to follow up
- Inadequate addiction treatment/relapse to drug use
- Untreated mental health comorbidities
- Homelessness, lack of social support
- Other (free text below)

---

Other barriers to OPAT completion for PWID

\_\_\_\_\_
